# Supplementary material
Source: MDPI journal article supplement (https://www.mdpi.com/1999-4907/15/2/366)
Supplement: s1 [file s1]

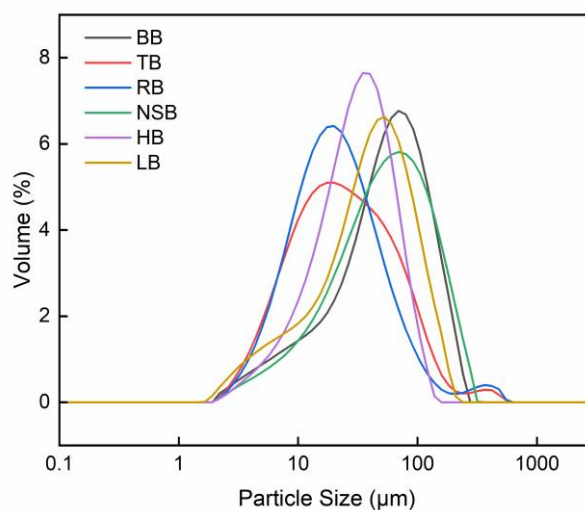

**Figure S1.** Size distribution of the six pecan biochars. BB, Branch biochar; TB, Trunk biochar; RB, Root biochar; NSB, Nut shell biochar; HB, Husk biochar; LB, Leaf biochar.

**Table S1.** Heavy metal contents in the six pecan biochars.

| Biochar | Fe<br>mg kg <sup>-1</sup> | Mn          | Zn          | Cr         | Cu<br>ug kg <sup>-1</sup> | Pb          | Cd          |
|---------|---------------------------|-------------|-------------|------------|---------------------------|-------------|-------------|
| BB      | 2.06±0.08c                | 0.42±0.02c  | 0.10±0.01d  | 0.02±0.00c | 11.67±0.41d               | 3.53±1.02b  | 0.55±0.20a  |
| TB      | 1.84±0.24c                | 0.83±0.01a  | 0.12±0.00c  | 0.02±0.00c | 15.67±1.95c               | 3.51±0.46b  | 0.61±0.30a  |
| RB      | 1.43±0.04c                | 0.27±0.02e  | 0.07±0.01e  | 0.01±0.00c | 12.51±0.55cd              | 1.03±0.68c  | 0.22±0.08b  |
| NSB     | 0.39±0.07d                | 0.34±0.02d  | 0.07±0.01e  | 0.03±0.01c | 12.29±0.61cd              | 5.05±0.51ba | ND          |
| HB      | 6.09±0.19b                | 0.22±0.01f  | 0.31±0.010a | 1.64±0.34b | 23.77±3.66b               | 1.11±2.30b  | ND          |
| LB      | 21.65±0.78a               | 21.65±0.78b | 0.15±0.01b  | 3.37±0.22a | 41.35±0.88a               | 5.77±0.13a  | 0.32±0.16ab |

Note: Duncan method was used for multiple comparisons, with the significant differences between six pecan biochars represented by different letters ( $p < 0.05$ ). ND, not detectable. BB, Branch biochar; TB, Trunk biochar; RB, Root biochar; NSB, Nut shell biochar; HB, Husk biochar; LB, Leaf biochar.
